# Supplementary material for: Mafosfamide Boosts GMI-HBVac against HBV via Treg Depletion in HBV-Infected Mice
Source: MDPI journal article supplement (doi:10.3390/vaccines11061026), 2023-05-25
Supplement: s1 [file s1]

Supplementary materials

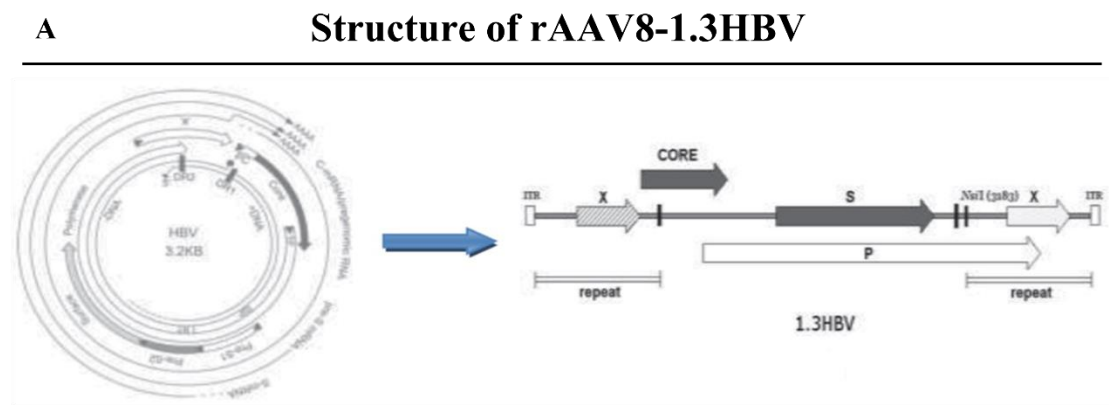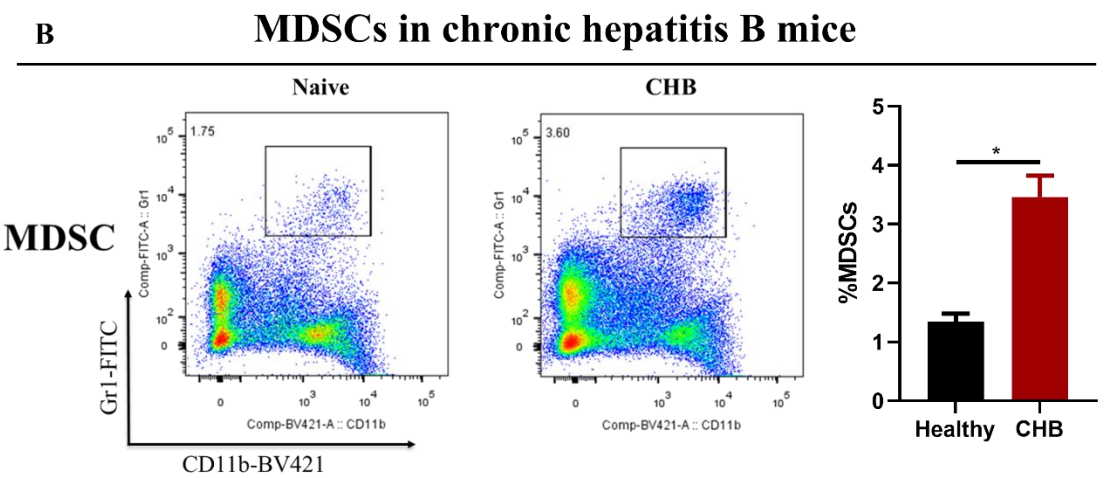

Supplementary 1: structure of rAAV8-1.3HBV(A) and increased MDSCs in rAAV8-1.3HBV infected mice(B).

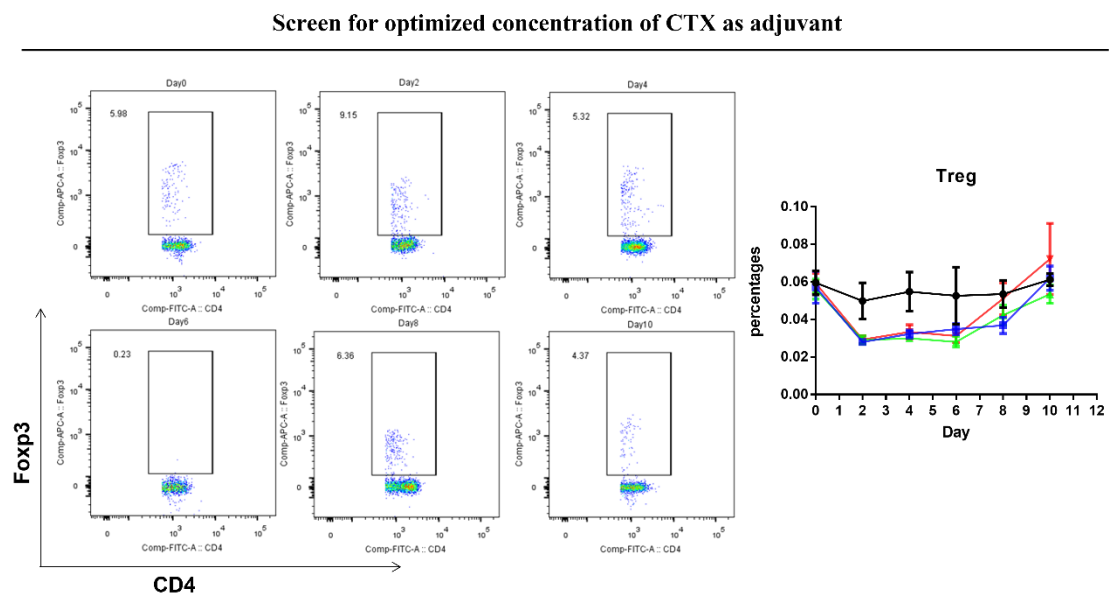

Supplementary 2: Screen for an optimized concentration of CTX as adjuvant.

| Footpad(mm) | PBS  |      |      | GM-CSF+IFN- $\alpha$ +rHBVvac |      |      | CTX  |      |      | CTX+GM-CSF+IFN $\alpha$ +rHBVvac |      |      | MAF  |      |      | MAF+GM-CSF+IFN $\alpha$ +rHBVvac |      |      |
|-------------|------|------|------|-------------------------------|------|------|------|------|------|----------------------------------|------|------|------|------|------|----------------------------------|------|------|
| 24h         | 0.10 | 0.04 | 0.02 | 0.33                          | 0.32 | 0.24 | 0.12 | 0.16 | 0.12 | 0.31                             | 0.34 | 0.40 | 0.28 | 0.38 | 0.21 | 0.44                             | 0.48 | 0.46 |
| 48h         | 0.08 | 0.11 | 0.09 | 0.23                          | 0.19 | 0.16 | 0.13 | 0.14 | 0.09 | 0.22                             | 0.23 | 0.21 | 0.18 | 0.26 | 0.22 | 0.34                             | 0.38 | 0.36 |
| 72h         | 0.05 | 0.08 | 0.06 | 0.12                          | 0.08 | 0.06 | 0.14 | 0.13 | 0.11 | 0.12                             | 0.14 | 0.11 | 0.13 | 0.20 | 0.15 | 0.30                             | 0.27 | 0.33 |

Supplementary 3: Footpad of mice after immunization.

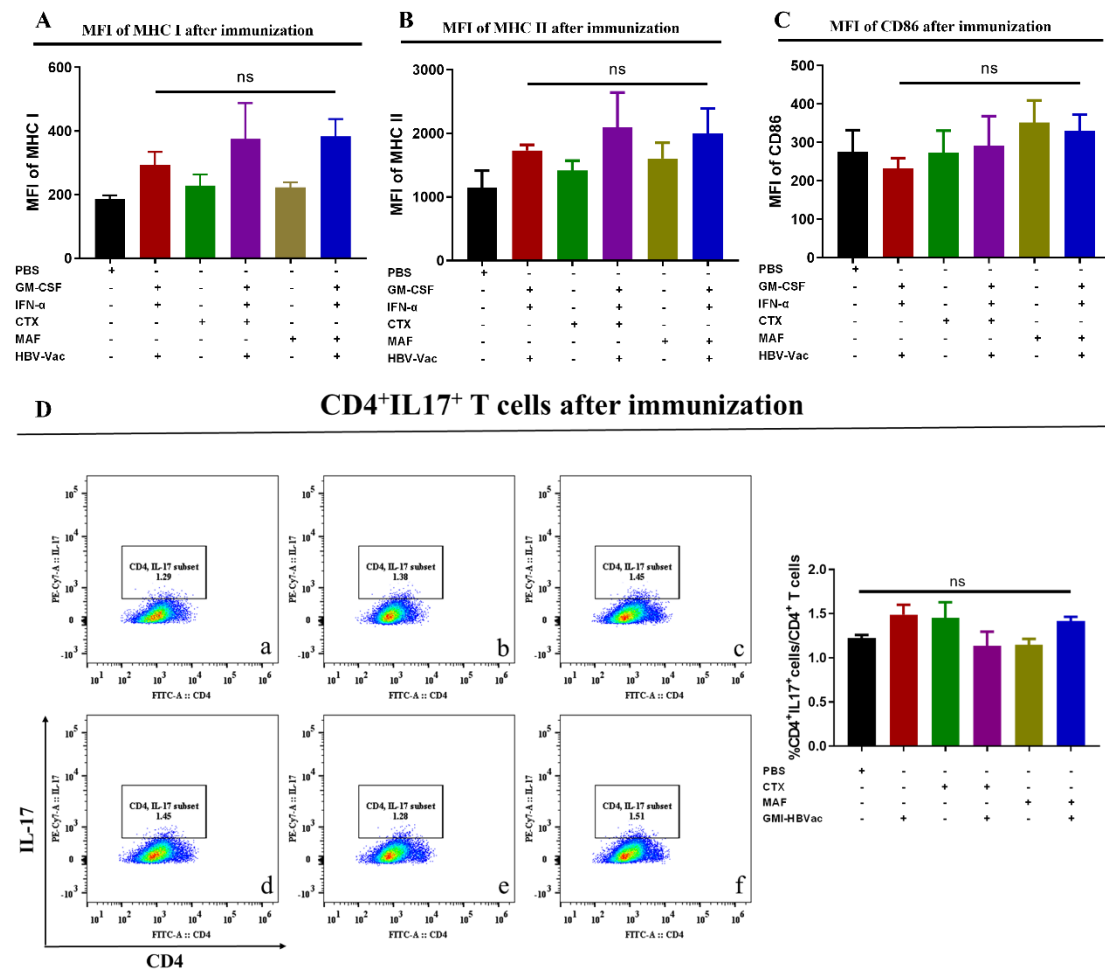

Supplementary 4: costimulatory molecule of DC(A, B, C) and CD4<sup>+</sup>IL17<sup>+</sup> cells(D) in peripheral blood after immunization. (a: PBS, b: GMI-HBVac, c: CTX, d: CTX+GMI-HBVac, e: MAF, f: MAF+GMI-HBVac)

## Spleen after immunization

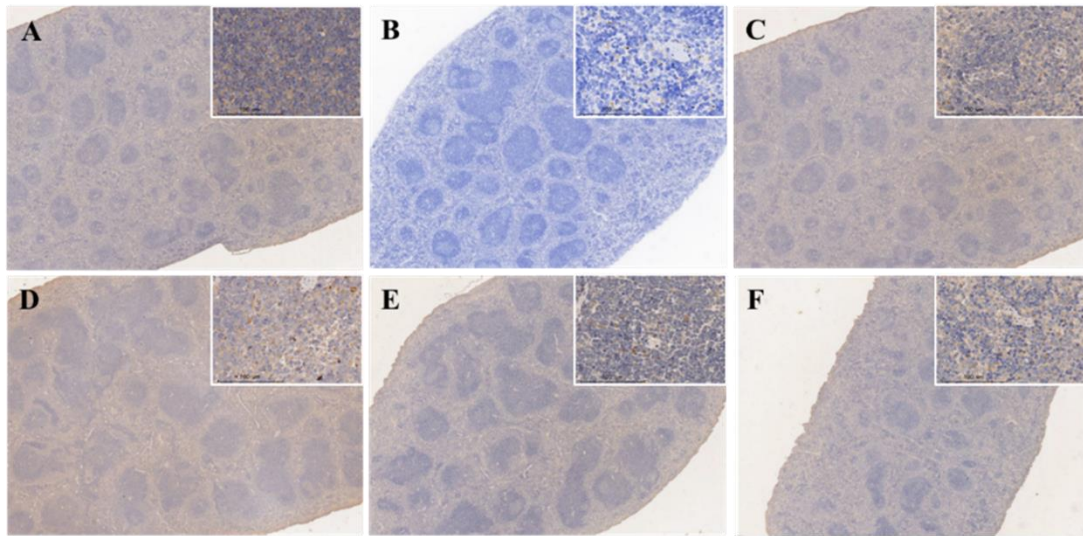

## CD4 immunohistochemistry stains in spleen

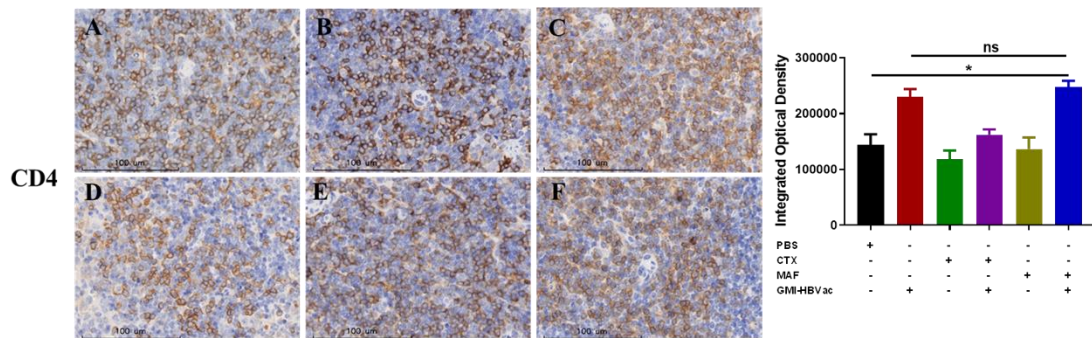

## CD8 immunohistochemistry stains in spleen

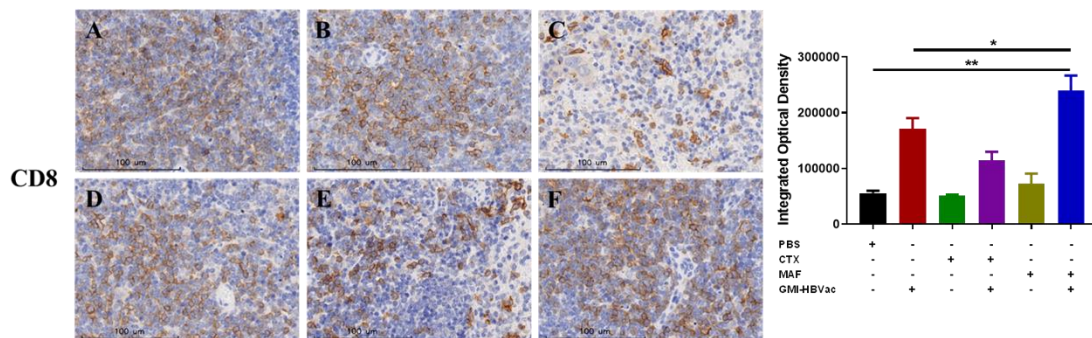

Supplementary 5: Immunohistochemistry stains of CD4 and CD8 in spleen after immunization. (a: PBS, b: GMI-HBVac, c: CTX, d: CTX+GMI-HBVac, e: MAF, f: MAF+GMI-HBVac)
